# Supplementary material
Source: Springer Nature journal article supplement (https://www.springermedizin.de/resource/supplementary/12968_2008_44_MOESM2_ESM.pdf/9577854)

rest

stress

rest

stress

ED

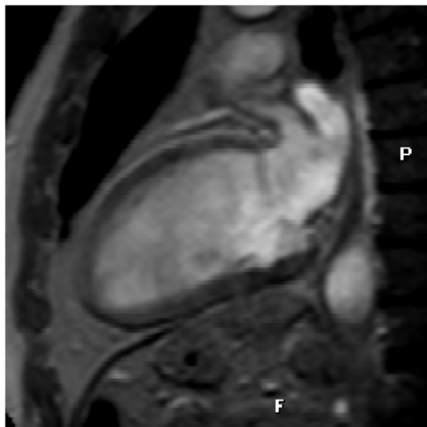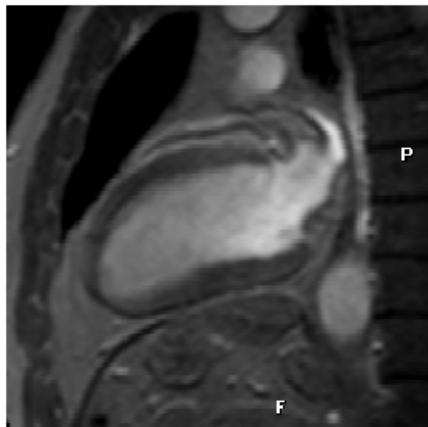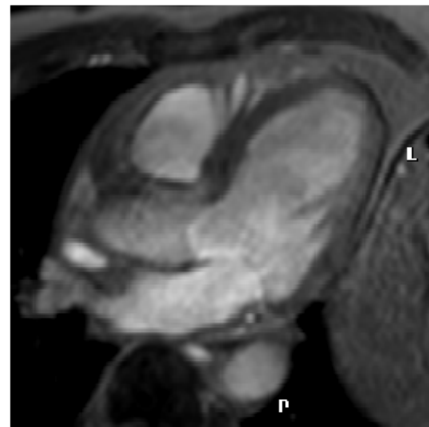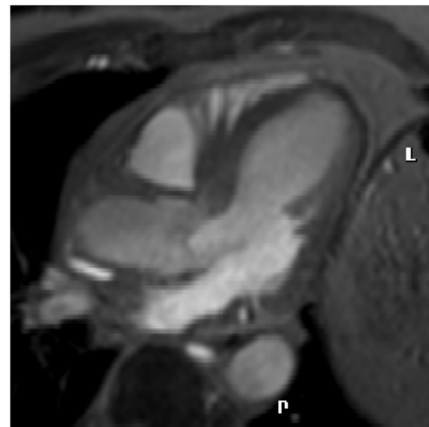

ES

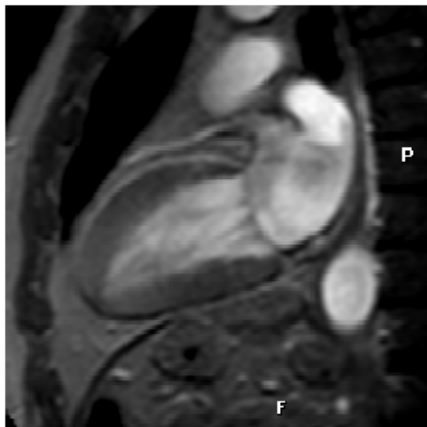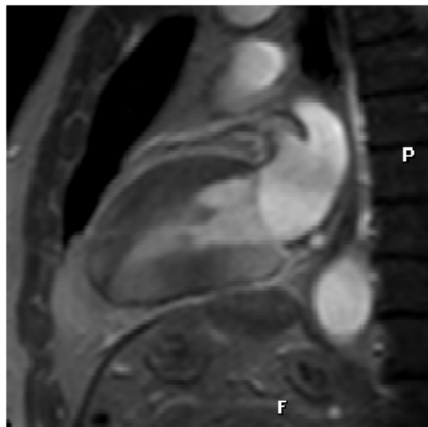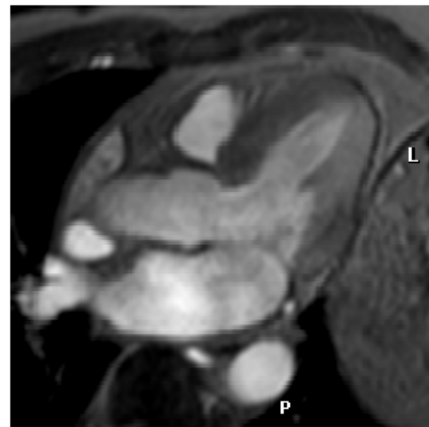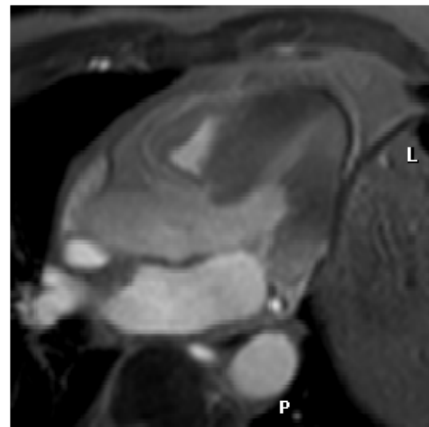

2-chamber

3-chamber

Supplement: MOESM2 [file 9577854]
